# Supplementary material
Source: Springer Nature journal article supplement (https://www.springermedizin.de/resource/supplementary/13023_2009_193_MOESM14_ESM.pdf/9641832)

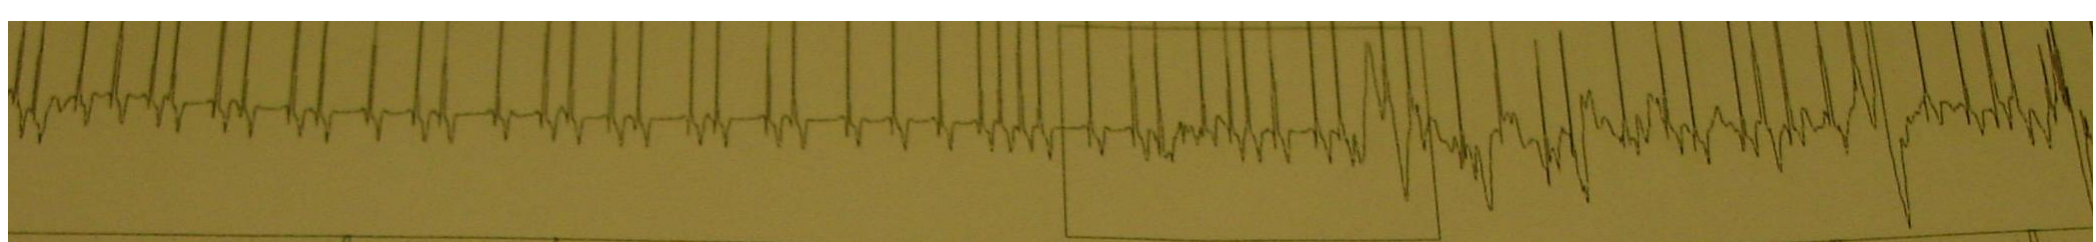

950

N

550

N

615

\*

300

N

585

N

375

N

585

N

875

N

510

N

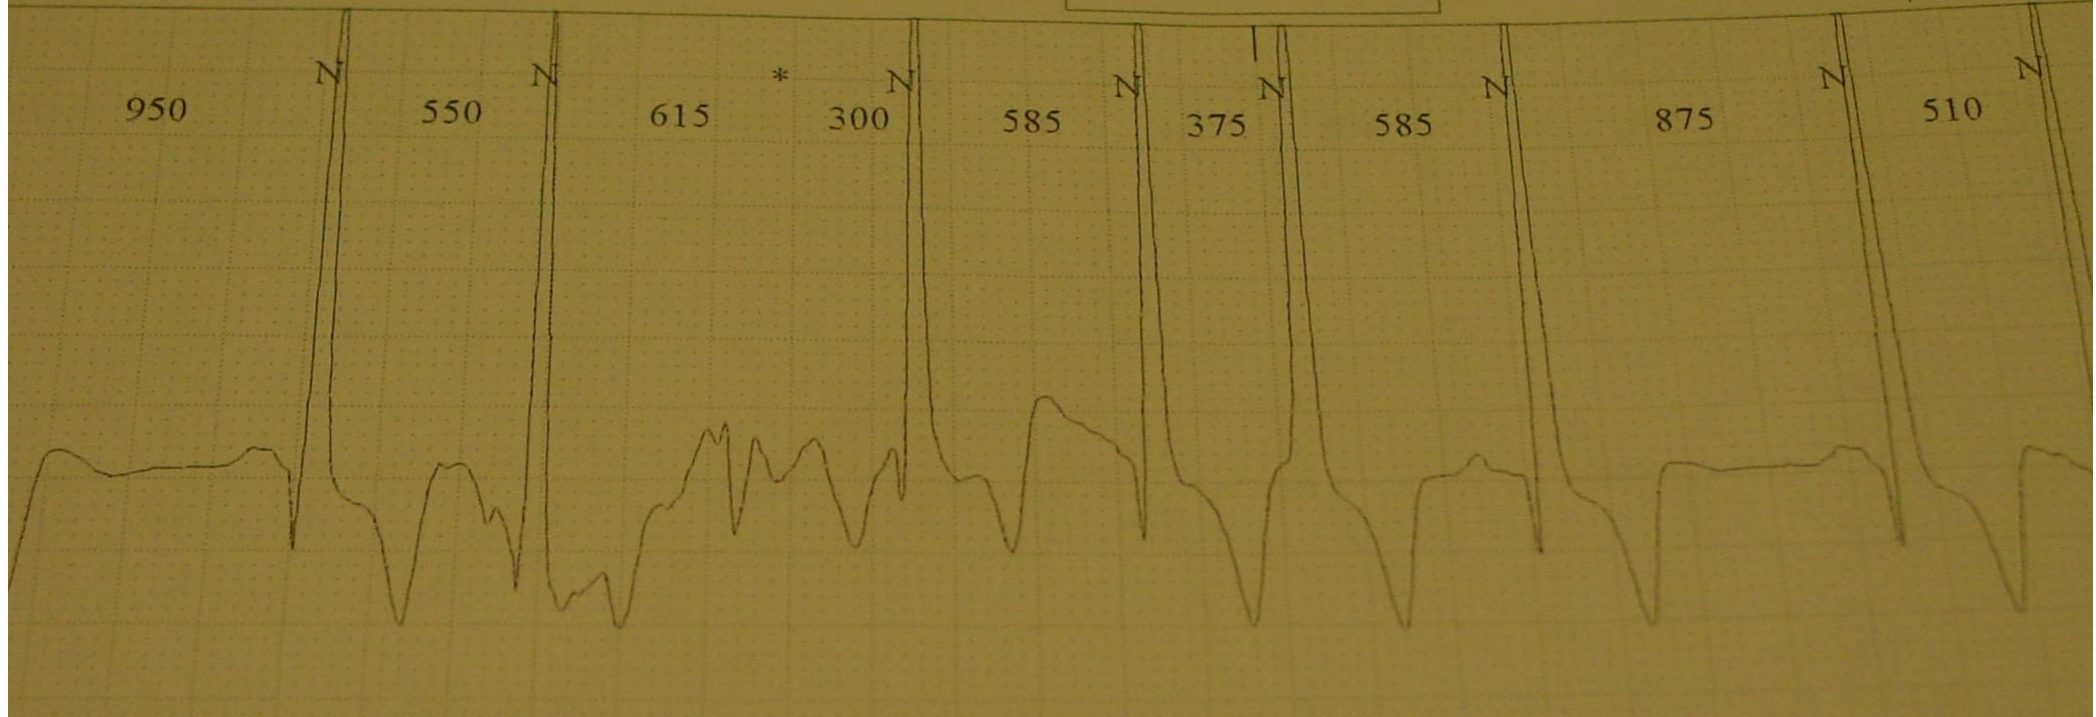

Supplement: MOESM14 [file 9641832]
